# Supplementary material for: Mangrove Habitat Use by Juvenile Reef Fish: Meta-Analysis Reveals that Tidal Regime Matters More than Biogeographic Region
Source: PLoS One. 2014 Dec 31;9(12):e114715. doi: 10.1371/journal.pone.0114715 (PMC4281128; doi:10.1371/journal.pone.0114715)
Supplement: S1 Dataset — Hedges' d values and their variance calculated with MetaWin for the comparison of fish densities among mangroves, seagrass beds and coral reefs. (XLSX) [file pone.0114715.s004.xlsx]

## Sheet: Data
Supporting dataset S1. Hedges′ d values and their variance calculated with MetaWin for the comparison of fish densities among mangroves (MG), seagrass beds (SG) and coral reefs (RF).
						Hedges' d				Variance
Location	Biogeographic area	Species	Tide	Salinity	# nursery spp.	d(SG-MG)	d(RF-SG)	d(RF-MG)		Var(SG-MG)	Var(RF-SG)	Var(RF-MG)
Aruba	Caribbean	Acanthurus chirurgus	0.65	34.2	17	0.63698	0.573364	1.26415		0.612315	0.435983	0.394178
Aruba	Caribbean	Chaetodon capistratus	0.65	34.2	17	0.807985	-0.0201255	1.35058		0.629965	0.424257	0.401711
Aruba	Caribbean	Gerres cinereus	0.65	34.2	17	0.703149		1.26718		0.618649		0.394434
Aruba	Caribbean	Haemulon flavolineatum	0.65	34.2	17	0.910643	8.03176	3.76599		0.642567	2.72814	0.813665
Aruba	Caribbean	Haemulon parra	0.65	34.2	17	1.25553		2.26265		0.69593		0.511563
Aruba	Caribbean	Haemulon plumieri	0.65	34.2	17	0.543577	-0.309207	0.977033		0.604439	0.427657	0.372729
Aruba	Caribbean	Haemulon sciurus	0.65	34.2	17	1.38302	2.58937	2.54454		0.719957	0.6637	0.556731
Aruba	Caribbean	Lutjanus analis	0.65	34.2	17	-0.906995	1.56206			0.642093	0.511387
Aruba	Caribbean	Lutjanus apodus	0.65	34.2	17	1.13802		2.05089		0.67584		0.481114
Aruba	Caribbean	Lutjanus griseus	0.65	34.2	17	0.771129	1.32394	1.46992		0.625808	0.486843	0.412932
Aruba	Caribbean	Lutjanus mahogoni	0.65	34.2	17	0.147326	1.11265	1.1149		0.584884	0.468457	0.382343
Aruba	Caribbean	Ocyurus chrysurus	0.65	34.2	17	0.047137	3.38471	1.05197		0.583492	0.833395	0.377797
Aruba	Caribbean	Scarus coeruleus	0.65	34.2	17	-0.768733	-0.201441	-0.323554		0.625544	0.425692	0.344399
Aruba	Caribbean	Scarus guacamaia	0.65	34.2	17	0.543577	-0.309207	0.978962		0.604439	0.427657	0.372855
Aruba	Caribbean	Scarus iserti	0.65	34.2	17	-0.370433	1.48406	1.9175		0.593135	0.502901	0.463469
Aruba	Caribbean	Sparisoma chrysopterum	0.65	34.2	17	-0.087222	1.93035	2.91048		0.583877	0.557322	0.623272
Aruba	Caribbean	Sphyraena barracuda	0.65	34.2	17	0.895043		1.613		0.640555		0.427635
Belize	Caribbean	Acanthurus chirurgus	0.31	37	17	0.869599	0.949986	1.65248		0.454477	0.344234	0.51698
Belize	Caribbean	Chaetodon capistratus	0.31	37	17	2.1063	-3.88307	0.928316		0.638493	0.889457	0.432029
Belize	Caribbean	Gerres cinereus	0.31	37	17	2.43583	0.683622	2.62832		0.713331	0.327498	0.706859
Belize	Caribbean	Haemulon flavolineatum	0.31	37	17	3.25485	0.968715	3.56492		0.94637	0.345616	0.970524
Belize	Caribbean	Haemulon parra	0.31	37	17
Belize	Caribbean	Haemulon plumieri	0.31	37	17	0.708441	0.586385	0.943005		0.441761	0.322749	0.433278
Belize	Caribbean	Haemulon sciurus	0.31	37	17	1.51576	0.701687	1.84024		0.531544	0.328461	0.546789
Belize	Caribbean	Lutjanus analis	0.31	37	17		-1.06294	-0.944981			0.352979	0.433448
Belize	Caribbean	Lutjanus apodus	0.31	37	17	4.25556	0.563284	4.56925		1.32215	0.321727	1.34186
Belize	Caribbean	Lutjanus griseus	0.31	37	17	1.76298	0.888328	1.90347		0.572071	0.339875	0.557548
Belize	Caribbean	Lutjanus mahogoni	0.31	37	17	0.897274	-0.725864	0.847776		0.456922	0.329788	0.425526
Belize	Caribbean	Ocyurus chrysurus	0.31	37	17	0.200189	-0.533241	-0.463479		0.41867	0.32046	0.402621
Belize	Caribbean	Scarus coeruleus	0.31	37	17
Belize	Caribbean	Scarus guacamaia	0.31	37	17	-1.53664	1.90248	0.791795		0.53473	0.448733	0.421354
Belize	Caribbean	Scarus iserti	0.31	37	17	2.90239	-2.76022	-0.743316		0.83786	0.602556	0.417972
Belize	Caribbean	Sparisoma chrysopterum	0.31	37	17
Belize	Caribbean	Sphyraena barracuda	0.31	37	17	1.90441	0.563284	2.05117		0.598006	0.321727	0.584098
Bermuda	Caribbean	Acanthurus chirurgus	1.27	36.6	17		-0.615131	-0.615131			0.589536	0.589536
Bermuda	Caribbean	Chaetodon capistratus	1.27	36.6	17	1.93019	-0.17816	1.1735		1.4657	0.577981	0.622827
Bermuda	Caribbean	Gerres cinereus	1.27	36.6	17
Bermuda	Caribbean	Haemulon flavolineatum	1.27	36.6	17	0.479824	-0.540252	-0.0742594		1.02878	0.586652	0.577107
Bermuda	Caribbean	Haemulon parra	1.27	36.6	17
Bermuda	Caribbean	Haemulon plumieri	1.27	36.6	17
Bermuda	Caribbean	Haemulon sciurus	1.27	36.6	17	0.237122	8.54151	2.88057		1.00703	3.00884	0.853512
Bermuda	Caribbean	Lutjanus analis	1.27	36.6	17
Bermuda	Caribbean	Lutjanus apodus	1.27	36.6	17
Bermuda	Caribbean	Lutjanus griseus	1.27	36.6	17	0.294755	15.7535	4.38536		1.01086	8.84934	1.21797
Bermuda	Caribbean	Lutjanus mahogoni	1.27	36.6	17
Bermuda	Caribbean	Ocyurus chrysurus	1.27	36.6	17		-0.657786	-0.657786			0.591346	0.591346
Bermuda	Caribbean	Scarus coeruleus	1.27	36.6	17		-0.472047	-0.472047			0.584351	0.584351
Bermuda	Caribbean	Scarus guacamaia	1.27	36.6	17	-0.571429	2.39954			1.04082	0.768849
Bermuda	Caribbean	Scarus iserti	1.27	36.6	17		-1.26584	-1.26584			0.630334	0.630334
Bermuda	Caribbean	Sparisoma chrysopterum	1.27	36.6	17		-0.947781	-0.947781			0.606866	0.606866
Bermuda	Caribbean	Sphyraena barracuda	1.27	36.6	17
Bimini	Caribbean	Acanthurus chirurgus	0.72	35	17	-0.399923	-0.00277413	-0.703139		0.283109	0.311111	0.38914
Bimini	Caribbean	Chaetodon capistratus	0.72	35	17	0.695896	-1.43875	0.457422		0.29392	0.385039	0.376177
Bimini	Caribbean	Gerres cinereus	0.72	35	17	0.601151	0.38219	0.531386		0.289824	0.316328	0.379502
Bimini	Caribbean	Haemulon flavolineatum	0.72	35	17	0.599379	-0.00715119	0.484806		0.289753	0.311113	0.37735
Bimini	Caribbean	Haemulon parra	0.72	35	17	-0.546584	0.522348			0.287736	0.320856
Bimini	Caribbean	Haemulon plumieri	0.72	35	17	-0.736955	0.672275	-0.613322		0.295881	0.327252	0.383765
Bimini	Caribbean	Haemulon sciurus	0.72	35	17	0.419587	0.834227	0.950306		0.283646	0.335966	0.407716
Bimini	Caribbean	Lutjanus analis	0.72	35	17
Bimini	Caribbean	Lutjanus apodus	0.72	35	17	1.02343	0.656968	0.8899		0.312692	0.326526	0.402663
Bimini	Caribbean	Lutjanus griseus	0.72	35	17	0.779691	0.735633	0.80641		0.298042	0.330438	0.396226
Bimini	Caribbean	Lutjanus mahogoni	0.72	35	17
Bimini	Caribbean	Ocyurus chrysurus	0.72	35	17	-0.399923	0.38219			0.283109	0.316328
Bimini	Caribbean	Scarus coeruleus	0.72	35	17
Bimini	Caribbean	Scarus guacamaia	0.72	35	17
Bimini	Caribbean	Scarus iserti	0.72	35	17	-0.387546	0.637531	0.721245		0.282784	0.325627	0.390312
Bimini	Caribbean	Sparisoma chrysopterum	0.72	35	17	-0.63597	0.346326	-0.613322		0.29126	0.315395	0.383765
Bimini	Caribbean	Sphyraena barracuda	0.72	35	17	1.17265		0.947827		0.323615		0.407502
Curacao	Caribbean	Acanthurus chirurgus	0.43	35.4	17	-0.0394494	0.580789	0.645361		0.174276	0.243136	0.237151
Curacao	Caribbean	Chaetodon capistratus	0.43	35.4	17		-1.89232	-1.95638			0.333235	0.326912
Curacao	Caribbean	Gerres cinereus	0.43	35.4	17	0.567423	0.549857	0.510731		0.181242	0.242165	0.233055
Curacao	Caribbean	Haemulon flavolineatum	0.43	35.4	17	0.833259	1.5848	0.962096		0.189336	0.303533	0.250549
Curacao	Caribbean	Haemulon parra	0.43	35.4	17	0.551419	0.435869	0.493396		0.180852	0.239043	0.232597
Curacao	Caribbean	Haemulon plumieri	0.43	35.4	17	0.0578059	0.793802	0.459508		0.174315	0.25127	0.231747
Curacao	Caribbean	Haemulon sciurus	0.43	35.4	17	1.09993	1.44975	1.07858		0.200543	0.292149	0.256804
Curacao	Caribbean	Lutjanus analis	0.43	35.4	17
Curacao	Caribbean	Lutjanus apodus	0.43	35.4	17	2.34089	0.448957	2.10523		0.293367	0.239365	0.342822
Curacao	Caribbean	Lutjanus griseus	0.43	35.4	17	0.640153	0.796421	0.592215		0.183151	0.251385	0.23542
Curacao	Caribbean	Lutjanus mahogoni	0.43	35.4	17	0.457071	0.796421	0.414843		0.178784	0.251385	0.230719
Curacao	Caribbean	Ocyurus chrysurus	0.43	35.4	17	0.3365	1.61363	0.649497		0.176704	0.306094	0.237292
Curacao	Caribbean	Scarus coeruleus	0.43	35.4	17	-0.67961	0.58615			0.184283	0.24331
Curacao	Caribbean	Scarus guacamaia	0.43	35.4	17	0.799436	0.363224	0.718403		0.188136	0.237431	0.239772
Curacao	Caribbean	Scarus iserti	0.43	35.4	17	-0.569786	1.27745	0.267689		0.1813	0.279096	0.228076
Curacao	Caribbean	Sparisoma chrysopterum	0.43	35.4	17	0.45327	0.502087	0.484103		0.178709	0.240769	0.232358
Curacao	Caribbean	Sphyraena barracuda	0.43	35.4	17	1.04789	0.473882	0.967547		0.198113	0.240004	0.250826
Grand Cayman	Caribbean	Acanthurus chirurgus	0.66	36.5	17	1.46809	0.753818	1.91759		0.464804	0.252824	0.50254
Grand Cayman	Caribbean	Chaetodon capistratus	0.66	36.5	17	1.57711	-2.88254	1.42626		0.478636	0.480494	0.43935
Grand Cayman	Caribbean	Gerres cinereus	0.66	36.5	17	1.29119	0.82071	2.31072		0.444466	0.255922	0.566474
Grand Cayman	Caribbean	Haemulon flavolineatum	0.66	36.5	17	0.895715	0.809198	1.03559		0.408429	0.25537	0.402359
Grand Cayman	Caribbean	Haemulon parra	0.66	36.5	17	1.18229	0.626316	1.53361		0.433242	0.247649	0.451571
Grand Cayman	Caribbean	Haemulon plumieri	0.66	36.5	17	-0.556075	0.189721	-0.363598		0.387884	0.23717	0.366196
Grand Cayman	Caribbean	Haemulon sciurus	0.66	36.5	17	0.383998	0.84717	2.242		0.381144	0.25722	0.554441
Grand Cayman	Caribbean	Lutjanus analis	0.66	36.5	17
Grand Cayman	Caribbean	Lutjanus apodus	0.66	36.5	17	1.05171	0.783014	1.17495		0.421087	0.254144	0.414208
Grand Cayman	Caribbean	Lutjanus griseus	0.66	36.5	17	1.06735	0.864676	1.90426		0.422468	0.258101	0.50058
Grand Cayman	Caribbean	Lutjanus mahogoni	0.66	36.5	17
Grand Cayman	Caribbean	Ocyurus chrysurus	0.66	36.5	17	-0.390071	0.491233			0.38134	0.243208
Grand Cayman	Caribbean	Scarus coeruleus	0.66	36.5	17
Grand Cayman	Caribbean	Scarus guacamaia	0.66	36.5	17	0.502541	0.491233	0.89063		0.385523	0.243208	0.39162
Grand Cayman	Caribbean	Scarus iserti	0.66	36.5	17	0.91469	0.897714	1.58608		0.409861	0.259814	0.457867
Grand Cayman	Caribbean	Sparisoma chrysopterum	0.66	36.5	17	1.19533	1.36106	1.75204		0.434534	0.290596	0.479175
Grand Cayman	Caribbean	Sphyraena barracuda	0.66	36.5	17	1.13539		1.20004		0.428713		0.416499
Abaco, Bahamas	Caribbean	Acanthurus chirurgus	0.89	36	17	-0.653197				0.702222
Abaco, Bahamas	Caribbean	Chaetodon capistratus	0.89	36	17
Abaco, Bahamas	Caribbean	Gerres cinereus	0.89	36	17
Abaco, Bahamas	Caribbean	Haemulon flavolineatum	0.89	36	17	0.663761				0.703382
Abaco, Bahamas	Caribbean	Haemulon parra	0.89	36	17
Abaco, Bahamas	Caribbean	Haemulon plumieri	0.89	36	17	0.646644				0.701512
Abaco, Bahamas	Caribbean	Haemulon sciurus	0.89	36	17	1.20063				0.786792
Abaco, Bahamas	Caribbean	Lutjanus analis	0.89	36	17	0.653197				0.702222
Abaco, Bahamas	Caribbean	Lutjanus apodus	0.89	36	17	0.976148				0.746072
Abaco, Bahamas	Caribbean	Lutjanus griseus	0.89	36	17	0.855236				0.727619
Abaco, Bahamas	Caribbean	Lutjanus mahogoni	0.89	36	17
Abaco, Bahamas	Caribbean	Ocyurus chrysurus	0.89	36	17	0.925512				0.738048
Abaco, Bahamas	Caribbean	Scarus coeruleus	0.89	36	17
Abaco, Bahamas	Caribbean	Scarus guacamaia	0.89	36	17
Abaco, Bahamas	Caribbean	Scarus iserti	0.89	36	17
Abaco, Bahamas	Caribbean	Sparisoma chrysopterum	0.89	36	17
Abaco, Bahamas	Caribbean	Sphyraena barracuda	0.89	36	17	0.653197				0.702222
Andros, Bahamas	Caribbean	Acanthurus chirurgus	0.86	36	17		-1.6088	-1.2666			0.882353	0.993761
Andros, Bahamas	Caribbean	Chaetodon capistratus	0.86	36	17	0.890724	-2.42616	0.694199		0.912672	1.15719	0.881525
Andros, Bahamas	Caribbean	Gerres cinereus	0.86	36	17
Andros, Bahamas	Caribbean	Haemulon flavolineatum	0.86	36	17
Andros, Bahamas	Caribbean	Haemulon parra	0.86	36	17
Andros, Bahamas	Caribbean	Haemulon plumieri	0.86	36	17
Andros, Bahamas	Caribbean	Haemulon sciurus	0.86	36	17	1.6542		1.6542		1.10697		1.10697
Andros, Bahamas	Caribbean	Lutjanus analis	0.86	36	17
Andros, Bahamas	Caribbean	Lutjanus apodus	0.86	36	17	1.95959		1.95959		1.21733		1.21733
Andros, Bahamas	Caribbean	Lutjanus griseus	0.86	36	17	2.31588		2.31588		1.36966		1.36966
Andros, Bahamas	Caribbean	Lutjanus mahogoni	0.86	36	17
Andros, Bahamas	Caribbean	Ocyurus chrysurus	0.86	36	17
Andros, Bahamas	Caribbean	Scarus coeruleus	0.86	36	17
Andros, Bahamas	Caribbean	Scarus guacamaia	0.86	36	17
Andros, Bahamas	Caribbean	Scarus iserti	0.86	36	17
Andros, Bahamas	Caribbean	Sparisoma chrysopterum	0.86	36	17
Andros, Bahamas	Caribbean	Sphyraena barracuda	0.86	36	17	0.890724		0.890724		0.912672		0.912672
Bimini	Caribbean	Acanthurus chirurgus	0.72	35	17	0.640991				0.700906
Bimini	Caribbean	Chaetodon capistratus	0.72	35	17	1.02645				0.754467
Bimini	Caribbean	Gerres cinereus	0.72	35	17
Bimini	Caribbean	Haemulon flavolineatum	0.72	35	17	1.30534				0.808659
Bimini	Caribbean	Haemulon parra	0.72	35	17
Bimini	Caribbean	Haemulon plumieri	0.72	35	17	0.602971				0.696964
Bimini	Caribbean	Haemulon sciurus	0.72	35	17	0.64197				0.70101
Bimini	Caribbean	Lutjanus analis	0.72	35	17	0.653197				0.702222
Bimini	Caribbean	Lutjanus apodus	0.72	35	17	1.30009				0.80752
Bimini	Caribbean	Lutjanus griseus	0.72	35	17	0.821224				0.722867
Bimini	Caribbean	Lutjanus mahogoni	0.72	35	17
Bimini	Caribbean	Ocyurus chrysurus	0.72	35	17
Bimini	Caribbean	Scarus coeruleus	0.72	35	17
Bimini	Caribbean	Scarus guacamaia	0.72	35	17
Bimini	Caribbean	Scarus iserti	0.72	35	17	0.653197				0.702222
Bimini	Caribbean	Sparisoma chrysopterum	0.72	35	17
Bimini	Caribbean	Sphyraena barracuda	0.72	35	17
Lee Stocking Island, Bahamas	Caribbean	Acanthurus chirurgus	1.34	36	17
Lee Stocking Island, Bahamas	Caribbean	Chaetodon capistratus	1.34	36	17	0.576079	-0.923022	-0.0273355		0.694322	0.737664	0.666729
Lee Stocking Island, Bahamas	Caribbean	Gerres cinereus	1.34	36	17
Lee Stocking Island, Bahamas	Caribbean	Haemulon flavolineatum	1.34	36	17	0.768025	-0.653197	0.753441		0.715822	0.702222	0.713973
Lee Stocking Island, Bahamas	Caribbean	Haemulon parra	1.34	36	17	0.877808		0.877808		0.730879		0.730879
Lee Stocking Island, Bahamas	Caribbean	Haemulon plumieri	1.34	36	17	0.493881	0	0.493881		0.686993	0.666667	0.686993
Lee Stocking Island, Bahamas	Caribbean	Haemulon sciurus	1.34	36	17	1.25946		1.25946		0.798852		0.798852
Lee Stocking Island, Bahamas	Caribbean	Lutjanus analis	1.34	36	17
Lee Stocking Island, Bahamas	Caribbean	Lutjanus apodus	1.34	36	17	1.15872		1.15872		0.778552		0.778552
Lee Stocking Island, Bahamas	Caribbean	Lutjanus griseus	1.34	36	17	2.61279		2.61279		1.23556		1.23556
Lee Stocking Island, Bahamas	Caribbean	Lutjanus mahogoni	1.34	36	17
Lee Stocking Island, Bahamas	Caribbean	Ocyurus chrysurus	1.34	36	17	0.852556	-0.292119	0.849862		0.727238	0.673778	0.726855
Lee Stocking Island, Bahamas	Caribbean	Scarus coeruleus	1.34	36	17
Lee Stocking Island, Bahamas	Caribbean	Scarus guacamaia	1.34	36	17
Lee Stocking Island, Bahamas	Caribbean	Scarus iserti	1.34	36	17	1.23212	1.30639	1.29049		0.793177	0.808889	0.805448
Lee Stocking Island, Bahamas	Caribbean	Sparisoma chrysopterum	1.34	36	17
Lee Stocking Island, Bahamas	Caribbean	Sphyraena barracuda	1.34	36	17	0.653197		0.653197		0.702222		0.702222
San Salvador, Bahamas	Caribbean	Acanthurus chirurgus	0.76	36	17			-1.29889				0.703842
San Salvador, Bahamas	Caribbean	Chaetodon capistratus	0.76	36	17			0.349283				0.592048
San Salvador, Bahamas	Caribbean	Gerres cinereus	0.76	36	17
San Salvador, Bahamas	Caribbean	Haemulon flavolineatum	0.76	36	17			0.65206				0.613704
San Salvador, Bahamas	Caribbean	Haemulon parra	0.76	36	17
San Salvador, Bahamas	Caribbean	Haemulon plumieri	0.76	36	17			0.595194				0.608637
San Salvador, Bahamas	Caribbean	Haemulon sciurus	0.76	36	17			1.41426				0.726199
San Salvador, Bahamas	Caribbean	Lutjanus analis	0.76	36	17
San Salvador, Bahamas	Caribbean	Lutjanus apodus	0.76	36	17			0.688944				0.617236
San Salvador, Bahamas	Caribbean	Lutjanus griseus	0.76	36	17			0.543577				0.604439
San Salvador, Bahamas	Caribbean	Lutjanus mahogoni	0.76	36	17
San Salvador, Bahamas	Caribbean	Ocyurus chrysurus	0.76	36	17
San Salvador, Bahamas	Caribbean	Scarus coeruleus	0.76	36	17
San Salvador, Bahamas	Caribbean	Scarus guacamaia	0.76	36	17
San Salvador, Bahamas	Caribbean	Scarus iserti	0.76	36	17			1.19631				0.685559
San Salvador, Bahamas	Caribbean	Sparisoma chrysopterum	0.76	36	17
San Salvador, Bahamas	Caribbean	Sphyraena barracuda	0.76	36	17			0.543577				0.604439
Turks and Caicos Islands	Caribbean	Acanthurus chirurgus	0.68	36	17		-0.92684	-0.92684			0.919237	0.919237
Turks and Caicos Islands	Caribbean	Chaetodon capistratus	0.68	36	17	-0.571429	-1.00743	-1.14873		1.04082	0.934826	0.965292
Turks and Caicos Islands	Caribbean	Gerres cinereus	0.68	36	17
Turks and Caicos Islands	Caribbean	Haemulon flavolineatum	0.68	36	17	0.571429		0.890724		1.04082		0.912672
Turks and Caicos Islands	Caribbean	Haemulon parra	0.68	36	17
Turks and Caicos Islands	Caribbean	Haemulon plumieri	0.68	36	17
Turks and Caicos Islands	Caribbean	Haemulon sciurus	0.68	36	17	0.514179	0.890724	0.890724		1.03305	0.912672	0.912672
Turks and Caicos Islands	Caribbean	Lutjanus analis	0.68	36	17	-0.571429	0.890724			1.04082	0.912672
Turks and Caicos Islands	Caribbean	Lutjanus apodus	0.68	36	17
Turks and Caicos Islands	Caribbean	Lutjanus griseus	0.68	36	17
Turks and Caicos Islands	Caribbean	Lutjanus mahogoni	0.68	36	17
Turks and Caicos Islands	Caribbean	Ocyurus chrysurus	0.68	36	17	-1.43261	2.2331			1.25655	1.33201
Turks and Caicos Islands	Caribbean	Scarus coeruleus	0.68	36	17
Turks and Caicos Islands	Caribbean	Scarus guacamaia	0.68	36	17
Turks and Caicos Islands	Caribbean	Scarus iserti	0.68	36	17	10.7335	1.00226	16.8347		15.4009	0.933786	29.174
Turks and Caicos Islands	Caribbean	Sparisoma chrysopterum	0.68	36	17
Turks and Caicos Islands	Caribbean	Sphyraena barracuda	0.68	36	17	26.4538	2.77696			88.4753	1.60448
Florida	Caribbean	Lutjanus griseus	0.67	40	2	0.331509				0.506869
Florida	Caribbean	Haemulon plumieri	0.67	40	2	-0.614875				0.523629
Mafia	Indo-Pacific	Calotomus coralinus	3.6	35	21		-3.8662	-2.41353			0.188955	0.203613
Mafia	Indo-Pacific	Cheilinus trilobatus	3.6	35	21	-0.229759	0.0179532	-1.92195		0.0378714	0.121014	0.179932
Mafia	Indo-Pacific	Cheilinus undulatus	3.6	35	21	-0.114969	0.0658764	-0.97409		0.037727	0.121032	0.149432
Mafia	Indo-Pacific	Hipposcarus harid	3.6	35	21	-0.325168	0.140692	-0.96913		0.0380647	0.121102	0.149325
Mafia	Indo-Pacific	Lethrinus harak	3.6	35	21	0.72302	0.498003	0.555206		0.0395866	0.122139	0.142314
Mafia	Indo-Pacific	Lethrinus lentjan	3.6	35	21	-0.338722	-1.83134	-1.38371		0.0380975	0.136257	0.160163
Mafia	Indo-Pacific	Lethrinus microdon	3.6	35	21		-1.8062	-1.12755			0.135841	0.153015
Mafia	Indo-Pacific	Lutjanus argentimaculatus	3.6	35	21		-1.75566	-1.09599			0.135023	0.152236
Mafia	Indo-Pacific	Lutjanus ehrenbergi	3.6	35	21	-0.189329	0.169103			0.0378096	0.121142
Mafia	Indo-Pacific	Lutjanus fulviflamma	3.6	35	21	-0.396805	-0.530371	-1.37872		0.0382534	0.122291	0.16001
Mafia	Indo-Pacific	Lutjanus monostigma	3.6	35	21	0.467054	-1.99986	-0.177608		0.0384749	0.139191	0.139239
Mafia	Indo-Pacific	Monodactylus argenteus	3.6	35	21
Mafia	Indo-Pacific	Mulloidichthys flavolineatus	3.6	35	21
Mafia	Indo-Pacific	Parupeneus indicus	3.6	35	21
Mafia	Indo-Pacific	Parupeneus macronema	3.6	35	21		-5.36442	-3.34882			0.251817	0.263496
Mafia	Indo-Pacific	Plectorhinchus flavomaculatus	3.6	35	21
Mafia	Indo-Pacific	Scarus ghobban	3.6	35	21	-0.394624	0.113412	-1.01861		0.0382471	0.121071	0.150417
Mafia	Indo-Pacific	Scarus psittacus	3.6	35	21	-0.22439	0.136464	-1.79676		0.0378625	0.121097	0.174759
Mafia	Indo-Pacific	Scolopsis ghanam	3.6	35	21	-0.274689	0.238504	-0.557812		0.0379541	0.121271	0.142346
Mafia	Indo-Pacific	Siganus stellatus	3.6	35	21	-0.114969	-0.372883	-1.31536		0.037727	0.121644	0.158113
Mafia	Indo-Pacific	Siganus sutor	3.6	35	21	-0.238759	-0.10286	-1.47725		0.0378868	0.12106	0.163136
Zanzibar	Indo-Pacific	Calotomus coralinus	3.9	36.4	21		-0.748657	-0.538101			0.0935329	0.172029
Zanzibar	Indo-Pacific	Cheilinus trilobatus	3.9	36.4	21	-0.690995	0.645713	-1.09526		0.149338	0.0920682	0.188882
Zanzibar	Indo-Pacific	Cheilinus undulatus	3.9	36.4	21	-1.21573	1.34834	-0.34126		0.161844	0.106365	0.168823
Zanzibar	Indo-Pacific	Hipposcarus harid	3.9	36.4	21	-0.879166	0.965093	-0.562448		0.153031	0.0973178	0.172525
Zanzibar	Indo-Pacific	Lethrinus harak	3.9	36.4	21	0.27591	0.36293	0.524099		0.144321	0.0891577	0.171753
Zanzibar	Indo-Pacific	Lethrinus lentjan	3.9	36.4	21	-0.516956	0.358286	-0.412658		0.14671	0.0891235	0.16982
Zanzibar	Indo-Pacific	Lethrinus microdon	3.9	36.4	21		-0.54433	-0.39124			0.090837	0.169501
Zanzibar	Indo-Pacific	Lutjanus argentimaculatus	3.9	36.4	21	1.00699	-0.198862	0.800804		0.156045	0.0882172	0.178542
Zanzibar	Indo-Pacific	Lutjanus ehrenbergi	3.9	36.4	21	0.71205		0.571399		0.149707		0.172713
Zanzibar	Indo-Pacific	Lutjanus fulviflamma	3.9	36.4	21	-0.0833294	-0.312672	-0.341544		0.143456	0.0888112	0.168827
Zanzibar	Indo-Pacific	Lutjanus monostigma	3.9	36.4	21	0.71205	-0.662724	0.566059		0.149707	0.0922953	0.1726
Zanzibar	Indo-Pacific	Monodactylus argenteus	3.9	36.4	21	0.78246		0.627902		0.151022		0.173968
Zanzibar	Indo-Pacific	Mulloidichthys flavolineatus	3.9	36.4	21		-0.321967	-0.231416			0.0888714	0.167658
Zanzibar	Indo-Pacific	Parupeneus indicus	3.9	36.4	21		-0.328272	-0.235947			0.0889132	0.167698
Zanzibar	Indo-Pacific	Parupeneus macronema	3.9	36.4	21	-0.950708	0.861724	-1.22458		0.154667	0.0953908	0.194437
Zanzibar	Indo-Pacific	Plectorhinchus flavomaculatus	3.9	36.4	21		-0.312498	-0.224609			0.0888101	0.167601
Zanzibar	Indo-Pacific	Scarus ghobban	3.9	36.4	21	-0.87454	0.957129	-0.795128		0.152929	0.0971615	0.178375
Zanzibar	Indo-Pacific	Scarus psittacus	3.9	36.4	21		-1.01079	-0.726512			0.0982391	0.176441
Zanzibar	Indo-Pacific	Scolopsis ghanam	3.9	36.4	21	-0.506114	0.523113	-0.993534		0.146571	0.0906059	0.184946
Zanzibar	Indo-Pacific	Siganus stellatus	3.9	36.4	21		-0.753504	-0.541585			0.0936072	0.172098
Zanzibar	Indo-Pacific	Siganus sutor	3.9	36.4	21	-0.351857	0.644346	0.316165		0.144917	0.0920502	0.168518
Wakatobi	Indo-Pacific	Lethrinus obsoletus	2	34	4	-1.22975				0.594518
Wakatobi	Indo-Pacific	Scolopsis ghanam	2	34	4	-1.86484				0.717351
Wakatobi	Indo-Pacific	Parupeneus macronema	2	34	4	0.359759				0.508089
Ryukyu Islands	Indo-Pacific	Lethrinus obsoletus	2.1	35	4		0.573032				0.260261
Ryukyu Islands	Indo-Pacific	Lethrinus harak	2.1	35	4		0.334269				0.253492
Pemba	Indo-Pacific	Calotomus coralinus	4	36.2	21			-4.36776				0.598827
Pemba	Indo-Pacific	Cheilinus trilobatus	4	36.2	21			-3.43961				0.508247
Pemba	Indo-Pacific	Cheilinus undulatus	4	36.2	21			-3.24771				0.492205
Pemba	Indo-Pacific	Hipposcarus harid	4	36.2	21			-4.45124				0.608029
Pemba	Indo-Pacific	Lethrinus harak	4	36.2	21			-3.53622				0.516671
Pemba	Indo-Pacific	Lethrinus lentjan	4	36.2	21			-4.06475				0.566888
Pemba	Indo-Pacific	Lethrinus microdon	4	36.2	21			-1.23331				0.379373
Pemba	Indo-Pacific	Lutjanus argentimaculatus	4	36.2	21			-3.24771				0.492205
Pemba	Indo-Pacific	Lutjanus ehrenbergi	4	36.2	21
Pemba	Indo-Pacific	Lutjanus fulviflamma	4	36.2	21			-35.6029				16.2049
Pemba	Indo-Pacific	Lutjanus monostigma	4	36.2	21			0.637961				0.365448
Pemba	Indo-Pacific	Monodactylus argenteus	4	36.2	21
Pemba	Indo-Pacific	Mulloidichthys flavolineatus	4	36.2	21
Pemba	Indo-Pacific	Parupeneus indicus	4	36.2	21
Pemba	Indo-Pacific	Parupeneus macronema	4	36.2	21			-9.4084				1.46684
Pemba	Indo-Pacific	Plectorhinchus flavomaculatus	4	36.2	21
Pemba	Indo-Pacific	Scarus ghobban	4	36.2	21			-3.69798				0.531299
Pemba	Indo-Pacific	Scarus psittacus	4	36.2	21			-10.9788				1.86704
Pemba	Indo-Pacific	Scolopsis ghanam	4	36.2	21			-3.24771				0.492205
Pemba	Indo-Pacific	Siganus stellatus	4	36.2	21			-1.45125				0.386687
Pemba	Indo-Pacific	Siganus sutor	4	36.2	21			-4.15328				0.575982
Mbegani	Indo-Pacific	Lethrinus harak	3.8	35.4	4	-1.45402	1.73303	1.1244		0.140819	0.137793	0.123078
Mbegani	Indo-Pacific	Lethrinus lentjan	3.8	35.4	4	-1.46091	1.15809	-0.709888		0.141097	0.117015	0.113073
Mbegani	Indo-Pacific	Lutjanus fulviflamma	3.8	35.4	4	0.538751	0.0574983	0.668291		0.115486	0.100292	0.112319
Mbegani	Indo-Pacific	Siganus sutor	3.8	35.4	4	-1.3249	1.38094	-1.39618		0.135835	0.124088	0.132092
Kunduchi	Indo-Pacific	Lethrinus harak	3.5	34	4	-0.524888	0.916159	0.441434		0.173572	0.136885	0.141573
Kunduchi	Indo-Pacific	Lethrinus lentjan	3.5	34	4	0.125665	0.468187	0.421127		0.168161	0.127766	0.141299
Kunduchi	Indo-Pacific	Lutjanus fulviflamma	3.5	34	4	2.21833	1.31134	3.07905		0.270353	0.149831	0.286662
Kunduchi	Indo-Pacific	Siganus sutor	3.5	34	4	-0.846339	1.03454	1.00924		0.182755	0.140281	0.154443
Moreton	Indo-Pacific	Calotomus carolinus	2.68	35	9	-0.301174	0.326698			0.0348366	0.0330062
Moreton	Indo-Pacific	Cheilinus undulatus	2.68	35	9
Moreton	Indo-Pacific	Lethrinus harak	2.68	35	9
Moreton	Indo-Pacific	Lethrinus obsoletus	2.68	35	9
Moreton	Indo-Pacific	Lutjanus argentimaculatus	2.68	35	9
Moreton	Indo-Pacific	Lutjanus fulviflamma	2.68	35	9	-0.431493	-0.089007	-0.320517		0.0351658	0.0327156	0.0174347
Moreton	Indo-Pacific	Mulloidichthys flavolineatus	2.68	35	9
Moreton	Indo-Pacific	Scarus ghobban	2.68	35	9	-0.626944	-0.454639	-0.712869		0.0358792	0.0333002	0.0182974
Palm Islands	Indo-Pacific	Calotomus carolinus	2.7	35	9
Palm Islands	Indo-Pacific	Cheilinus undulatus	2.7	35	9
Palm Islands	Indo-Pacific	Lethrinus harak	2.7	35	9			0.688101				0.0297259
Palm Islands	Indo-Pacific	Lethrinus obsoletus	2.7	35	9
Palm Islands	Indo-Pacific	Lutjanus argentimaculatus	2.7	35	9			0.608278				0.0294216
Palm Islands	Indo-Pacific	Lutjanus fulviflamma	2.7	35	9			0.486741				0.0290301
Palm Islands	Indo-Pacific	Mulloidichthys flavolineatus	2.7	35	9
Palm Islands	Indo-Pacific	Scarus ghobban	2.7	35	9			-0.404357				0.0288142
Solomon Islands	Indo-Pacific	Calotomus carolinus	1.64	35	9	-0.277469	0.328725			0.0368427	0.0257345
Solomon Islands	Indo-Pacific	Cheilinus undulatus	1.64	35	9	-0.661944	0.748349	-0.182229		0.038413	0.0271469	0.0334563
Solomon Islands	Indo-Pacific	Lethrinus harak	1.64	35	9	-1.18263	1.44227	0.443853		0.0425889	0.0318972	0.034063
Solomon Islands	Indo-Pacific	Lethrinus obsoletus	1.64	35	9	-0.473902	0.561444			0.0374844	0.0263819
Solomon Islands	Indo-Pacific	Lutjanus argentimaculatus	1.64	35	9	0.675603		0.733696		0.0384925		0.0353271
Solomon Islands	Indo-Pacific	Lutjanus fulviflamma	1.64	35	9	0.446664	0.266264	0.506752		0.0373754	0.0256184	0.0342844
Solomon Islands	Indo-Pacific	Mulloidichthys flavolineatus	1.64	35	9	-0.24734	0.279892	-0.128129		0.0367739	0.0256416	0.0333941
Solomon Islands	Indo-Pacific	Scarus ghobban	1.64	35	9	-0.356779	0.5678	0.290503		0.0370614	0.0264043	0.0336459
